---

## 1 Ancient DNAs and the Neolithic Chinese super-grandfather Y haplotypes

2  
3 Ye Zhang<sup>1</sup>, Xiaoyun Lei<sup>1</sup>, Hongyao Chen<sup>1</sup>, Hui Zhou<sup>2\*</sup> and Shi Huang<sup>1\*</sup>

4  
5  
6 <sup>1</sup>Center for Medical Genetics, Xiangya Medical School, Central South University,  
7 Changsha, Hunan 410078, People's Republic of China

8  
9 <sup>2</sup>Ancient DNA Laboratory, Research Center for Chinese Frontier Archaeology, Jinlin  
10 University, Changchun 130012

11  
12 \*Corresponding authors:

13 Shi Huang (huangshi@sklmg.edu.cn)

14 Hui Zhou (zhouhui@jlu.edu.cn)

15  
16 **Keywords:** Yangshao Culture, Miaodigou Culture, Banpo Culture, Hongshan Culture,  
17 Xiajiadian Culture, O2a2b1a1a-F5, O2a1c1a1a1a-F11, ancient DNA

18  
19 **Running title:** Ancient DNAs and the Neolithic Chinese super-grandfather Y  
20 haplotypes

### 21 22 23 **Abstract**

24 Previous studies identified 3 Neolithic Han Chinese super-grandfather Y  
25 haplotypes, O2a2b1a1a-F5, O2a2b1a2a1-F46, and O2a1b1a1a1a-F11, but their  
26 relationships with the archaeological and written records remain unexplored. We here  
27 report genome wide DNA data for 12 ancient samples (0.02x-1.28x) from China  
28 ranging from 6500 to 2500 years before present (YBP). They belonged to 4 different  
29 genetic groups, designated as Dashanqian (DSQ) of Xiajiadian Culture in the  
30 Northeast, Banpo (BP) of middle Yangshao Culture in the Central West, Zhengzhou  
31 Xishan (ZX) of Miaodigou Culture in the Central Plains, and Others. Present day F5  
32 samples were closer in autosomal distances to the ZX and DSQ groups while F11, C,  
33 O1, and O2 samples were closer to the BP group. We also sequenced the Y  
34 chromosome of one of these ancient samples K12 from DSQ and found both K12 and  
35 a previously reported ~4000 year old sample MG48 from Northwest China to have the  
36 O2a2b1a1a1a2a-F2137 haplotype, belonging to the most prolific branch  
37 O2a2b1a1a1-F438 immediately under F5. We further found close relationships  
38 between ZX and DSQ and between ZX and ancient M117 Tibetans or present day  
39 Southwest Dai Chinese carrying the F5 subtype O2a2b1a1a6, implicating radiations  
40 of F5 subtypes from the putative place of F5 origin in ZX. These results are  
41 remarkably consistent with archaeological and written records.

42  
43

---

## 44 Introduction

45 There are numerous data for human activity in China from the time of the  
46 Neolithic period to the beginning of written records. There were the Gaomiao and  
47 Pengtoushan Culture of ~5800 BC in the South (Hunan), the Jiahu Culture and  
48 Peiligang Culture of 7000-5000 BC in the Central Plains (Henan), the Xinglongwa  
49 Culture of 6200-5400 BC and later the Hongshan and Xiajiadian Cultures in the  
50 Northeast (Inner Mongolia-Liaoning border), the Dadiwan Culture of 5800-5400 BC in  
51 Gansu and Western Shaanxi <sup>1</sup>. At 5000 BC to 3000 BC, the Yangshao Culture was  
52 the most popular and existed extensively along the Yellow River in China and  
53 flourished mainly in the provinces of Henan, Shaanxi and Shanxi with the early period  
54 of the Culture mostly found in Shaanxi and the late period in Henan <sup>1</sup>. Elements of the  
55 middle to late Yangshao Culture, the Miaodigou Culture, have been found widely in  
56 China, including the Hongshan Culture in the Northeast (3500 BC), indicating the  
57 broad cultural migration and influence of this Culture <sup>2</sup>.

58 By analyzing the Y chromosome haplotype patterns, three Neolithic  
59 super-grandfather haplotypes have been discovered that together account for ~40%  
60 of present day Han Chinese males <sup>3-5</sup>. The expansion dates are estimated 5400 YBP  
61 (years before present) for O3a2c1a-M117-F5 (O2a2b1a1a-F5 or F8, ISOGG 2017),  
62 6500 YBP for O3a2c1-F46 (O2a2b1a2a1-F46), or 6800 YBP for O3a1c-002611-F11  
63 (O2a1b1a1a1a-F11), and these three haplotypes represent 16%, 11%, and 14% of  
64 present day Han Chinese males, respectively. Several historical writings on ancient  
65 Chinese mention the great leaders/ancestors around the time of 5000 years ago or  
66 earlier, including *Fu Xi*, *Yan Emperor* (Yandi), *Huang Emperor* (Huangdi), and *Chi*  
67 *You*.

68 It remains unclear how the Neolithic Cultures were related to the  
69 super-grandfather haplotypes and how the different Neolithic Cultures were  
70 interconnected. We here addressed these questions by analyzing ancient DNA  
71 samples from 10 different sites in Central and Northern China. We found evidence of  
72 F5 associated autosomes in the Miaodigou Culture in Henan, F11 associated  
73 autosomes in the early Yangshao Culture in Banpo, and both F5 haplotype and F5  
74 associated autosomes in the Xiajiadian Culture in Inner Mongolia. The results provide  
75 a coherent account of information from the relevant fields.

76

## 77 Results:

### 78 Relationships among aDNAs in Central and Northern China

79 We collected 12 skeletal remains from 10 sites in Central and Northern China that  
80 were 2500-6500 years old (Table 1). DNAs were extracted and sequenced to different  
81 degrees of coverage (0.018x-1.27x). SNPs were called using the Hg19 reference  
82 genome. We obtained two sets of SNPs, one slow and the other fast, with the slow set  
83 informative for phylogenetics and the fast set representing natural selection and  
84 maximum saturation as detailed before <sup>6-12</sup>. We then merged the SNPs of each of the  
85 aDNA samples with those of the 1000 genomes project (1kGP) <sup>13</sup>, and obtained  
86 pairwise genetic distances, i.e., mismatch in homozygous (hom) sites for slow SNPs  
87 or mismatch in all sites for fast SNPs, between each aDNA sample and all individuals

88 in the 1kGP.

89

90 **Table 1. Information on ancient samples for which we report the nuclear**  
91 **sequence data in this study.**

| Sample name | Ages (BP) | # SNPs slow | Coverage | Culture          | Sites                               |
|-------------|-----------|-------------|----------|------------------|-------------------------------------|
| FQ17        | 2500      | 1200        | 0.113    | East Zhou        | Fushan Qiaobei, Shanxi              |
| K2          | 3000      | 8300        | 1.2796   | Xiajiadian Upper | Dashanqian, Chifeng, Inner Mongolia |
| K12         | 3000      | 2000        | 0.2071   | Xiajiadian Upper | Dashanqian, Chifeng, Inner Mongolia |
| S1          | 3920      | 350         | 0.043    | Xiaoheyuan       | Halahaigou, Chifeng, Inner Mongolia |
| SG2046      | 3500      | 1500        | 0.1668   | Xiajiadian Lower | Sanguan, Hebei                      |
| DZ14        | 5000      | 1980        | 0.0712   | Late Yangshao    | Duzhong, Mianchi Henan              |
| BP38        | 6500      | 966         | 0.0556   | Yangshao         | Banpo, Xian                         |
| ZX167       | 5300      | 3722        | 0.0674   | Miaodigou        | Zhengzhou Xishan, Henan             |
| ZX107       | 5300      | 161         | 0.0179   | Miaodigou        | Zhengzhou Xishan, Henan             |
| PAB3002     | 3000      | 2300        | 0.2361   | Gaotaishan       | Pinganbao, Liaoning                 |
| ZK22        | 4200      | 500         | 0.0485   | Zhukaigou        | Zhukaigou, Ordos, Inner Mongolia    |
| H69         | 3500      | 1692        | 0.0304   | Early Shang      | Xuecun, Zhengzhou, Henan            |

92

93 Because different ancient samples were sequenced at different coverages, it is  
94 unrealistic to use SNP mismatches to infer relationships as there would be few shared  
95 SNPs among different samples. As an alternative, we calculated the correlation  
96 coefficient  $R$  of two genomes in their distance to the East Asian (ASN) samples in  
97 1kGP, assuming that different random sampling of a fraction of the whole set of ~15K  
98 slow SNPs are roughly equivalent in representing the whole set. Verification of this  $R$   
99 correlation approach has been described previously<sup>6</sup>.

100 We tested the correlation of ancient samples within themselves relative to their  
101 correlation with present day Han Chinese in order to better infer the relationships  
102 among the ancient samples. We obtained for each aDNA  $R$  values with each other  
103 and with the 211 Han Chinese samples in 1kGP. We then ranked these  $R$  values as  
104 shown in Table 2, which then allowed us to infer genetic relationships among these  
105 aDNAs. We grouped these 12 aDNAs into 4 groups based on being from the same  
106 site and being closely related to each other as indicated by correlation rankings. In  
107 Table 2, rank values means the rank of a sample on the column among all 223  
108 samples in values of correlation to a sample listed on the row, e.g., K2 from the  
109 column was ranked 7<sup>th</sup> among all samples in correlation with K12 from the row. The 4  
110 groups were designated as the Dashanqian (DSQ) group including the 2 samples  
111 from the Xiajiadian Culture in Dashanqian in Chifeng (K2 and K12) known to be  
112 related to the Hongshan Culture<sup>14</sup>, one sample S1 from the Xiaoheyuan Culture at the  
113 Hala Haigou site in Chifeng related to the Hongshan Culture<sup>15</sup> and one sample FQ17  
114 from the East Zhou dynasty at Fushan Qiaobei Shanxi<sup>16</sup>; the Banpo (BP) group  
115 including a sample BP38 from the middle Yangshao Culture site at Banpo Xian<sup>17</sup>, a  
116 late Yangshao sample DZ14 from Duzhong Henan<sup>18</sup>, one sample SG2046 from  
117 Sanguan Hebei known to be influenced by both Yangshao and Xiajiadian<sup>19</sup>, one  
118 sample ZK22 from Zhukaigou Inner Mongolia<sup>20</sup>, and one sample H69 from the early

119 Shang site at Xuecun Henan <sup>21</sup>; the Zhengzhou Xishan (ZX) group including 2  
120 samples from the same Zhengzhou Xishan site of Miaodigou Culture in the Central  
121 Plains (ZX167 and ZX107) <sup>22</sup>; and finally the Other group including PAB3002 of  
122 Gaotaishan Liaoning <sup>23</sup>.

123

124 **Table 2. Ranks in correlation between each pair of ancient samples among 211**  
125 **Han Chinese in 1KG and 12 ancient samples.** Rank values listed means the rank of  
126 a sample on the column among all 223 samples in values of correlation to a sample  
127 listed on the row.

128

|         | FQ17 | K2  | K12 | S1  | SG2046 | DZ14 | BP38 | ZK22 | H69 | ZX167 | ZX107 | PAB3002 |
|---------|------|-----|-----|-----|--------|------|------|------|-----|-------|-------|---------|
| FQ17    |      | 170 | 173 | 169 | 220    | 126  | 182  | 152  | 78  | 74    | 207   | 221     |
| K2      | 20   |     | 7   | 90  | 217    | 206  | 209  | 61   | 169 | 69    | 167   | 193     |
| K12     | 184  | 103 |     | 5   | 222    | 180  | 198  | 174  | 109 | 190   | 192   | 143     |
| S1      | 218  | 215 | 149 |     | 218    | 188  | 206  | 204  | 106 | 211   | 193   | 196     |
| SG2046  | 221  | 219 | 222 | 151 |        | 41   | 99   | 164  | 166 | 173   | 179   | 213     |
| DZ14    | 210  | 222 | 220 | 221 | 10     |      | 1    | 21   | 5   | 215   | 219   | 215     |
| BP38    | 208  | 221 | 203 | 182 | 171    | 16   |      | 187  | 189 | 158   | 210   | 126     |
| ZK22    | 169  | 187 | 189 | 180 | 199    | 43   | 191  |      | 16  | 221   | 202   | 113     |
| H69     | 102  | 217 | 155 | 7   | 214    | 35   | 205  | 18   |     | 222   | 120   | 191     |
| ZX167   | 23   | 172 | 164 | 89  | 161    | 128  | 72   | 208  | 196 |       | 97    | 190     |
| ZX107   | 220  | 213 | 198 | 135 | 204    | 182  | 204  | 197  | 94  | 160   |       | 205     |
| PAB3002 | 222  | 214 | 151 | 61  | 215    | 136  | 90   | 123  | 133 | 204   | 178   |         |

129

130

131 These groupings mostly showed expected relationships based on geophysical  
132 distances, for example, the close genetic relationship of the 3 Chifeng samples in the  
133 DSQ group. Also, FQ17 in the DSQ group was located in the Y shaped region known  
134 to be a common migration route linking the Central Plains with the Northeast <sup>24</sup>. A  
135 notable exception was ZX167 who had K2 and FQ17 from DSQ group among the  
136 most related aDNA samples rather than ZX107 from the same site (K2 and FQ17  
137 ranked higher than all other aDNAs in R correlation to ZX167, being at 69<sup>th</sup> and 74<sup>th</sup>,  
138 respectively). However, ZX107 did have ZX167 as the most related aDNA (the ranking  
139 of 97<sup>th</sup> was the highest among all aDNAs in R correlation to ZX107), consistent with  
140 the geographical location.

141 ZX167 was the 172<sup>th</sup> ranked in relation to K2 and the closest to K2 among non  
142 DSQ samples. K2 was the 69<sup>th</sup> ranked in relation to ZX167 and the closest to ZX167  
143 among all aDNAs samples here. This indicated gene flow between DSQ and ZX,  
144 which is consistent with the known archaeological findings of a migration of Miaodigou  
145 Culture to the Niuheliang site in Chifeng Inner Mongolia <sup>2</sup>.

146 DZ14 was the first ranked among all in relation to BP38 with R values  
147 substantially higher than the next (0.38 for DZ14 and 0.24 for the second ranked) and  
148 BP38 was 16<sup>th</sup> ranked among all in R to DZ14. This indicated gene flow between  
149 Banpo Shannxi (BP38) of middle Yangshao Culture and Duzhong Henan (DZ14) of

---

150 late Yangshao Culture, consistent with archaeological findings.

151

152 **Relationships between aDNAs and present day samples carrying the**  
153 **super-grandfather haplotypes**

154 We first determined to which present day populations the ancient Chinese  
155 samples may be closely related. We used the informative slow SNPs to calculate  
156 pairwise genetic distances between each ancient DNA and each of the 1kGP samples  
157 as described previously<sup>6,7</sup>. For samples such as K2 with relatively large number of  
158 slow SNPs covered, we were able to perform informative distance analyses and  
159 principle components analysis (PCA). The results showed K2 to be closest to East  
160 Asians in genetic distances (Figure 1A). K2 was closer to Europeans than most East  
161 Asians as shown by PCA plots (Figure 1B), which is consistent with the location of K2  
162 at Dashanqian Chifeng Inner Mongolia where East and West admixture are known to  
163 have occurred<sup>25</sup>. Interestingly, K2 was more related to South East Asians such as  
164 KHV and Hunan people and least related to Northern Chinese CHB (Han Chinese in  
165 Beijing), consistent with the known migration of ancient Southwest people from  
166 Gaomiao Culture in Hunan to the Jiahu Culture in Henan and in turn to the Hongshan  
167 Culture in the Northeast as indicated by archaeological records (8 pointed star)<sup>26</sup>. In  
168 contrast, PCA plots using fast SNPs clustered all aDNA samples here with PEL  
169 (Peruvian in Lima, Peru) and as outliers to the ASN samples (Figure 1C and data not  
170 shown), which was reminiscent of the surprising finding with European aDNAs that  
171 ancient samples (>2000 years old) were often not the direct ancestors of present day  
172 Europeans living in the same area<sup>27-30</sup>. These results from the fast SNPs were in  
173 direct conflict with all other lines of data and hence most likely wrong, which in turn  
174 provided additional support for the theoretical justification for using slow SNPs in  
175 demographic inferences<sup>6-12</sup>.  
176

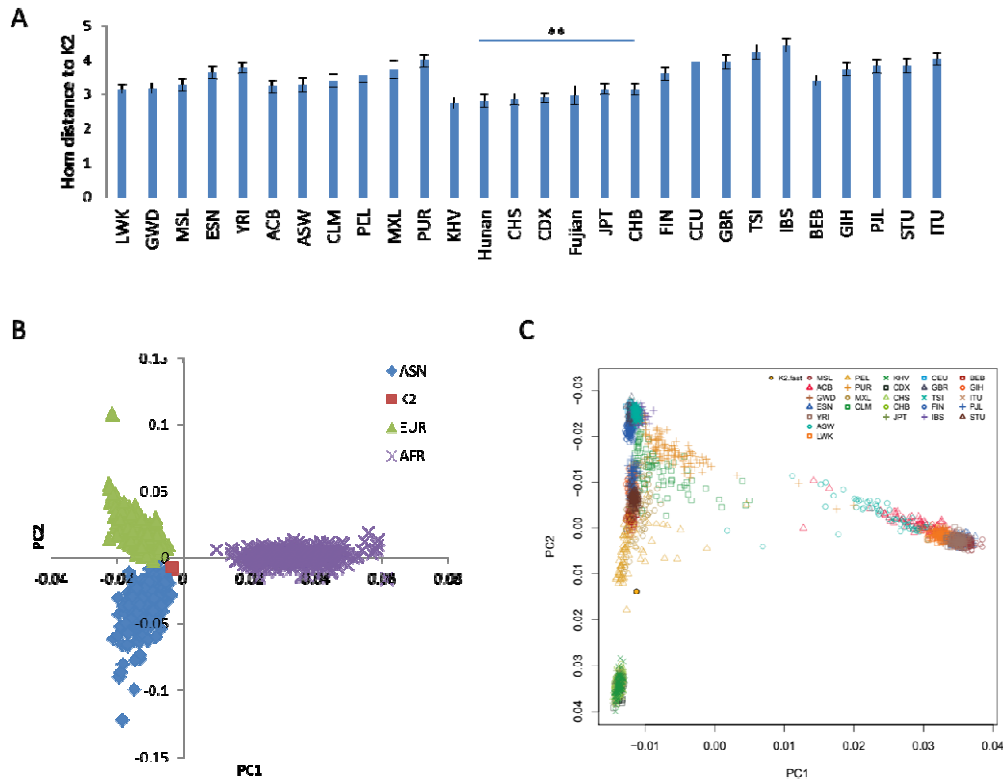

177

178

179 **Figure 1. Relationship of ancient Chinese genomes with present day**

180 **populations.** A. Pairwise genetic distance between K2 sample and 1kGP samples.

181 Distances were mismatches in homozygous sites. Standard error of the mean (SEM)

182 is shown. B. PCA plots (PC1 and PC2) of K2 merged with 1kGP samples using slow

183 SNPs. Only ASN, EUR, and AFR samples of 1kGP are selectively shown. C. PCA

184 plots (PC1 and PC2) of K2 merged with 1kGP samples using fast SNPs.

185

186 We performed correlation analyses using distances to European samples of  
 187 1kGP to determine whether the aDNAs here were more related to East Asians (CHS  
 188 Southern Han Chinese) or Europeans (CEU, Utah Residents with Northern and  
 189 Western European Ancestry). All informative aDNAs with R values greater than  
 190 expected by random simulations ( $>0.02$ ) showed greater affinity to CHS than to CEU  
 191 (Table 3). Some samples had too few SNPs to be informative. Therefore, although  
 192 the numbers of SNPs here were limited, which would weaken the strength of  
 193 correlations, most samples were still informative enough to be able to properly identify  
 194 the correct group affiliations of these aDNAs.

195

196 **Table 3. Correlation of ancient samples from China with Han Chinese (CHS) or**  
 197 **Europeans (CEU) of 1kGP.** Shown are Spearman correlation R values in distance to  
 198 EUR samples in 1kGP. Two samples from Han Chinese of 1kGP were shown as  
 199 positive controls. Comparisons were deemed non-informative when R values were  
 200  $0.1 - 0$  or  $-0.1 - 0$ , which happens to be found for randomly scrambled distance

201 values as shown for CHS\_HG00478.

202

---

| Sample names       | R in EUR distance |        |        |
|--------------------|-------------------|--------|--------|
|                    | CHS               | CEU    | T test |
| FQ17               | 0.010             | 0.039  | ni     |
| K2                 | 0.423             | 0.229  | <0.01  |
| K12                | 0.179             | 0.165  |        |
| S1                 | 0.125             | 0.080  | <0.01  |
| SG2046             | 0.165             | 0.152  |        |
| DZ14               | 0.136             | 0.126  |        |
| BP38               | 0.197             | 0.126  | <0.01  |
| ZK22               | 0.182             | 0.073  | <0.01  |
| H69                | 0.158             | 0.138  | <0.05  |
| ZX167              | 0.306             | 0.211  | <0.01  |
| ZX107              | -0.024            | 0.010  | ni     |
| PAB3002            | 0.114             | 0.088  | <0.01  |
| CHS_HG00478        | 0.623             | 0.376  | <0.01  |
| CHB_NA18611        | 0.512             | 0.380  | <0.01  |
| CHS_HG00478 random | -0.008            | -0.020 | ni     |

---

203

204

205

206 Our previous studies showed that individuals carrying the same Y haplotype were  
207 also more related in autosomes, which could only be shown with slow but not fast  
208 autosomal SNPs<sup>7</sup>. We next determined the autosomal relationship of each aDNA to  
209 present day people carrying the super-grandfather Y haplotypes. We calculated the  
210 average rank in R values of each aDNA to the F5 samples relative to the F11 and F46  
211 samples in the 211 Han Chinese in 1kGP. A ratio <1 in the F5 rank versus the F11 or  
212 F46 rank means closer relationship to the F5 samples relative to the F11 or F46  
213 samples. Relative to F11 samples, DSQ and ZX but not BP were found closer to F5  
214 samples, indicating that the DSQ and ZX groups had more F5 associated autosomes  
215 and less F11 associated autosomes whereas the BP group had the opposite (Figure  
216 2A). Relative to the F46 samples, DSQ and BP groups were more evenly related to F5  
217 and F46 but the ZX group was still more related to F5, indicating that the ZX group  
218 had probably the most F5 associated autosomes among the aDNAs examined here.  
219 BP38 was the only sample in the BP group that had significantly more F11 than F46  
220 ( $P < 0.01$ , chi-squared test), indicating close relationship of BP38 with the F11  
221 haplotype known to be common in Southern China. While DSQ and ZX groups were  
222 both related to F5, DSQ was more related to F46 than ZX.

223 We also did the same analysis using total pairwise distance values calculated  
224 from the set of fast evolving SNPs, as would normally be done by the field. The results  
225 showed that all 3 aDNA groups (DSQ, DZ, and ZX) had F5/F11 ratio <1 (0.81-0.84),  
226 indicating no sensible correlation of any kind. Such dramatic difference in results  
227 obtained from the fast and the slow SNPs was consistent with previous findings<sup>6,7</sup>,

228 confirming again that only slow SNPs could be used for informative analyses in  
229 phylogenetic studies or in detecting specific association between autosomes and Y  
230 haplotypes.

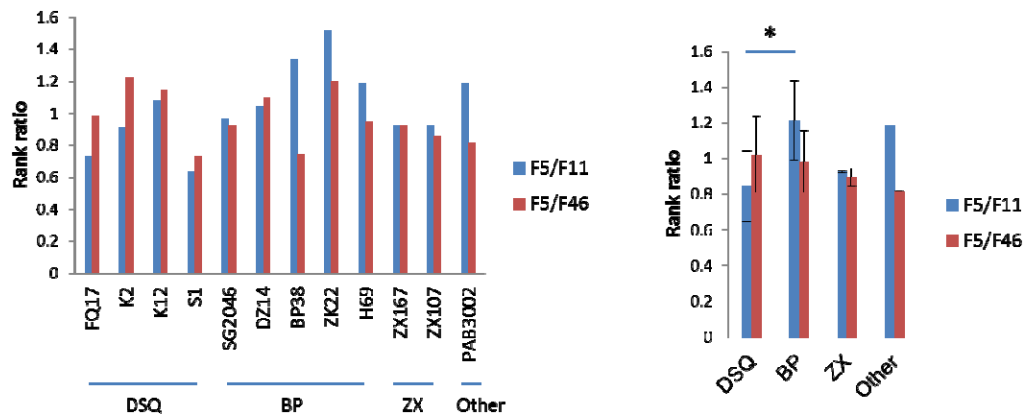

231

232 **Figure 2. Autosomal relationships of aDNAs with Han Chinese samples of 1kGP**  
233 **carrying F5, F11, or F46 haplotypes.** R correlation values with 211 Han Chinese and  
234 12 aDNAs were obtained and ranked for each aDNA sample. The average rank to F5,  
235 F11, or F46 was calculated for each sample listed here and the ratios in the ranks are  
236 shown either for each sample (A) or the average of each group (B).

237

238

239 To determine further the possible Y haplotypes associated with the aDNA groups,  
240 we studied the autosomal relationship of aDNAs with present day samples grouped  
241 by different haplotypes. We determined the relative distance to DSQ vs BP or to ZX vs  
242 BP for different sets of 1kGP samples with each set associated with a particular  
243 haplotype. For each sample, we calculated a rank in the subtraction value of ‘the rank  
244 to DSQ subtracting the rank to BP (DSQ-BP)’ with small values (<120 with 120 being  
245 the middle rank corresponding to the subtraction value 0) meaning higher rank in  
246 relation to DSQ relative to BP. We also similarly calculated a rank in the value of ‘the  
247 rank to ZX subtracting the rank to BP (ZX-BP)’. The samples of the M134 clade  
248 containing both F5 and F46 samples were significantly closer to ZX or DSQ than  
249 samples carrying O1 and O2 haplotypes (F5/F46 and O1/O2 in Figure 3). Relative to  
250 DSQ, samples carrying F11 and C were the closest to the BP group although not  
251 significant. The results suggest that BP group had more autosomal ancestry from  
252 Southern China as O1, O2, F11, and C are known to be common in the South.

253



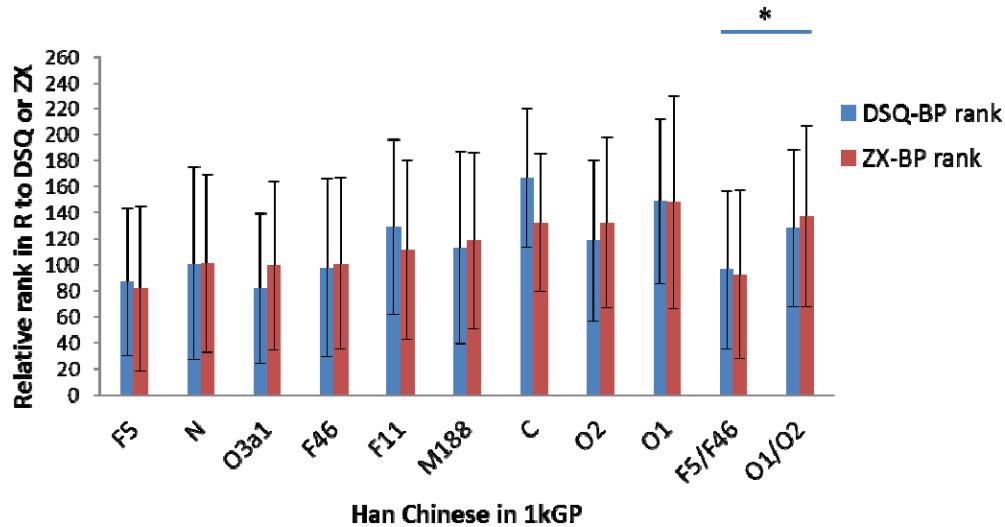

254

255

256

257

258

259

260

261

262

263

264

265

266

267

268

269

270

271

272

273

274

275

276

277

278

279

280

281

282

283

### Figure 3. Relative autosomal distance of aDNAs to Han Chinese in 1kGP

grouped by Y haplotypes. Ranks in R to aDNA groups were determined and ranks were shown for the subtraction values of 'rank to DSQ subtracting the rank to BP (DSQ-BP)' or 'rank to ZX subtracting the rank to BP (ZX-BP)'. Small subtraction ranks (<120) means closer rank to DSQ or ZX, and higher value means closer rank to BP.

### Ancient DNA relationships with Southwest Chinese carrying M117 or the F5 subtype O2a2b1a1a6

Tibetans are known to commonly carry M117<sup>31</sup> and a subtype of M117 or F5, O2a2b1a1a6, is common in Southwest Chinese<sup>32</sup>. If both DSQ and ZX groups may be candidate group for the origin of F5, it would be important to ask which group is more related to Southwest people carrying M117 or O2a2b1a1a6. We made use of 4 previously published Tibetan genomes of 3150-1250 years old, including 3 M117 and one D haplotype (markers downstream of M117 were not covered)<sup>31</sup>. We obtained the slow SNPs set and calculated the pairwise genetic distance with each member of 1kGP for each of the ancient Tibetans.

To determine which of the 12 aDNA samples was closely related to the M117 Tibetans, we obtained correlation R ranking of the 3 M117 Tibetans in relation to each aDNA among 227 samples including 211 Han Chinese, 12 Han aDNAs, and 4 Tibetan aDNAs (Figure 4A). The highest rank for the M117 Tibetans was found in correlation with the ZX group among the 4 aDNA groups. The results indicated possible gene flow between the ZX group and the M117 Tibetans.

The haplotype O2a2b1a1a6 was commonly found in Southwest Chinese such as the Dai<sup>32</sup>. To further confirm the putative role of ZX in the origin of this haplotype, we studied the CDX samples (Chinese Dai in Xishuangbanna) of the 1kGP. We first confirmed that CDX samples carrying O2a2b1a1a6 were closely related to M117 Tibetans in autosomal genetic distances. We obtained R values of each aDNA with the CDX samples using their genetic distance to East Asian samples in 1kGP. We classified the M117 samples in CDX into 2 different haplogroups (O2a2b1a1a6 and

284 other M117), and calculated the average R of the CDX in relation to the Tibetans. The  
285 results showed that CDX samples carrying O2a2b1a1a6 were significantly closer to  
286 M117 Tibetans than CDX samples carrying other M117 haplotypes. CDX samples  
287 carrying the C haplotype were significantly closer to the D type Tibetan than to M117  
288 Tibetans, consistent with C and D belonging to the ABCDE clade<sup>7</sup>. The results  
289 indicated that the autosomes of ancient M117 Tibetans were more related to those  
290 associated with O2a2b1a1a6, suggesting that ancient Tibetans likely carried the  
291 O2a2b1a1a6 haplotype.

292 We next divided the CDX samples into 3 Y groups (O2a2b1a1a6, Other M117,  
293 and C) and tested their relationships with the 4 groups of aDNAs here. We obtained  
294 correlation values of each aDNA to each of 99 CDX, 103 CHB, and 50 CHS samples  
295 of 1kGP. Among the 4 aDNA groups, the ZX group was found closest to the  
296 O2a2b1a1a6 samples and the only aDNA group that showed significantly closer  
297 distance to O2a2b1a1a6 samples than to C samples (Figure 4C). The results suggest  
298 a specific association of the ZX group with populations that carried the O2a2b1a1a6  
299 haplotype, indicating either that ZX was enriched with the O2a2b1a1a6 haplotype or  
300 that ZX was the ancestral population giving rise to the group carrying the  
301 O2a2b1a1a6 haplotype. Given the present day distribution of O2a2b1a1a6 in the  
302 Southwest, it is more likely for ZX, being located in the Central Plains, to be the  
303 ancestral group to the O2a2b1a1a6 haplotype.

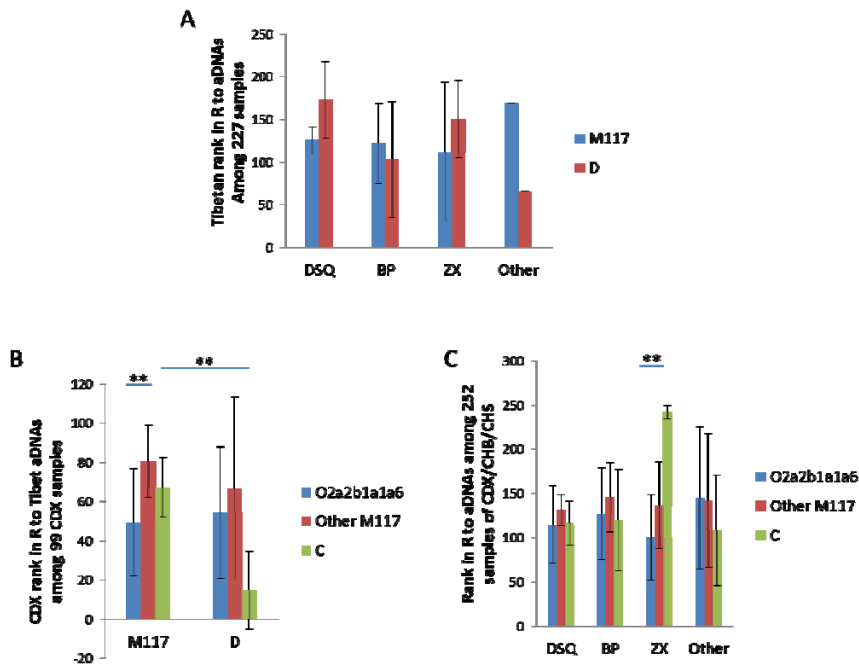

304

305

306 **Figure 4. Relationship of the O2a2b1a1a6 haplotype with aDNA samples. A.**

307 Relationship between ancient Tibetans and the aDNA groups in this study. B.

308 Relationship of Tibetans with CDX samples carrying different Y haplotypes. C.

309 Relationship with aDNA groups of this study for CDX samples carrying different Y

310 haplotypes.

311

312 **Analyses of ancient Y chromosomes**

313 Given the autosomal relationships of both the DSQ and ZX group with present  
314 day people carrying the F5 haplotype, it may be expected that at least some members  
315 of these two groups may carry the F5 haplotype. We performed Y chromosome  
316 sequence analysis on the only sample here that was good enough for high coverage  
317 sequencing analysis, the ~3000 year old K12 from Upper Xiajiabian Culture in West  
318 Liao River Valley, Northeast China<sup>14</sup>. We also analyzed the published sequence of  
319 the MG48 individual from the ~4000 year old Mogou site of the Qijia Culture in  
320 Northwest China<sup>33</sup>. The results showed both K12 and MG48 to be F438-F2137 with  
321 no mutations in sites that define downstream haplotypes under F2137. The results  
322 provided additional support for the presence of the F5 lineage in the DSQ group.

323

324 **Discussion:**

325 Our results here showed that aDNAs in Central and Northern China from this  
326 study could be separated into 4 groups based on autosomal relationships among  
327 them. Two among these, ZX and DSQ, were related to F5 associated autosomes. The  
328 BP group was more related to autosomes associated with the O1, O2, C, and F11 that  
329 are commonly found in the South while the ZX group was more associated with the F5  
330 and F46 haplotypes common in the Central Plains and the North (8/12 F11 samples in  
331 Han Chinese were CHS and 6/8 F11 in CHS were from Hunan). This indicates that the  
332 BP group might be migrants from the South. Consistently, analyses of human skulls of  
333 the Duzhong and Banpo sites indicated close relationship with populations from South  
334 China<sup>34,35</sup>. Human skulls from the Zhengzhou Xishan site or other Miaodigou sites  
335 such as Shanxian Henan however showed mixed features related to both Yangshao  
336 and Dawenkou people<sup>36,37</sup>. Thus, people from different Miaodigou sites in Henan,  
337 such as Duzhong and Xishan, appear to have different cranial features, consistent  
338 with DNA findings here. The DNA results confirm the suggestion based on  
339 archaeological and historical records that the early Yangshao Culture and its possible  
340 predecessor the Peiligang/Jiahu Culture may be associated with migrants under the  
341 legendary *Yan* or *Fuxi* Emperor from the South such as the Pengtoushan and  
342 Gaomiao Culture<sup>26,38</sup>.

343 The DSQ group had one sample K12 carrying F5 while the ZX group was  
344 non-informative for Y chromosome. There are at least 7 branches immediately under  
345 F5<sup>32</sup>. The F438 branch appears to be of high social economic status (SES) based on  
346 it having shorter branch length, more descendant branches, and higher fitness (lower  
347 risk for autism)<sup>4</sup>. The O2a2b1a1a1a2a2 haplotype of K12 and MG48 belongs to F438.  
348 If the original F5 haplotype had a fitness advantage that might have contributed to its  
349 super-grandfather status in the first place, haplotypes with fewer random variations  
350 from the original F5 haplotype should be expected to retain the most of the fitness  
351 advantage of F5 and as such to be more likely to confer high SES status and produce  
352 more descendants. Thus populations in ancient times near the time of the original F5  
353 would be expected to be enriched with haplotypes closest to F5. Thus the finding of  
354 two of two informative samples that have high coverage sequence data being of the

355 F438-F2137 haplotype is consistent with *a priori* expectation of higher prevalence of a  
356 high SES haplotype in ancient times.

357 It appears that the ZX group may be more directly linked to the origin of F5 as it  
358 was both related to DSQ in the Northeast and the Southwest people carrying the F5  
359 subtype O2a2b1a1a6. The common presence of F438-F2137 in the 3000-4000 YBP  
360 time period in the North indicates unlikely the presence of F\* haplotype in the North in  
361 ancient times. The most parsimonious explanation for these observations is the  
362 diversification and radiation of F5 sub-branches from a centrally located population  
363 such as ZX where F\* might originate.

364 Present day Chinese are thought to be the descendants of *Yan* and *Huang*.  
365 Based on archaeological and historical records, scholars have suspected an  
366 association of *Yan* with the Yangshao Culture in the Central Plains (but with ancestry  
367 from the South such as the Gaomiao Culture in Hunan) and *Huang* with the Hongshan  
368 Culture in the Northeast<sup>24,38,39</sup>.

369 The Miaodigou Culture was a most popular Culture of its time and known to have  
370 impacted the Northeast HongShan Culture (and the subsequent Xiajiadian Culture to  
371 which the DSQ group belonged), more so than any other Culture of the time such as  
372 the Dawenkou Culture<sup>2</sup>. Our DNA findings here suggest that there were people in the  
373 Central Plains closely related to the super-ancestor F5 lineage and possibly  
374 associated with the Miaodigou Culture. These conclusions from DNA studies are  
375 consistent with the suggestion from archaeological and historical studies that the  
376 Miaodigou Culture, and in particular the first walled town (made of rammed earth) of  
377 Xishan, may be linked to the lineage of *Huang* who is known to be the first to have  
378 built walled towns in Chinese history<sup>22</sup>. People of this lineage are believed to have  
379 also lived in the Northeast (Hongshan and Xiajiadian Culture) including the great  
380 Zhuangxi Emperor, a grandson of *Huang*, and to have migrated down to the Central  
381 Plains in later times during a cold climate period<sup>24,39</sup>. Samples from the Niuhejiang  
382 site of Hongshan Culture are 13.7% for haplotype O2a2b1-M134 (downstream sites  
383 remain to be determined) and future studies of more samples are needed to  
384 determine if F5 was present at this site<sup>40</sup>.

385 Overall, our study identified the presence of F5 genomes in ancient samples from  
386 the Central Plains and the Northeast and implicates the origin of the F5 lineage in the  
387 Central Plains and subsequent diversification and migration to the Northeast and  
388 Southwest. The remarkable unification of ancient DNA results with archaeological and  
389 written records can only be found when we used slow SNPs but not fast SNPs. This  
390 provides further confirmation of our new molecular methodology in demographic  
391 inferences.

392

393 **Acknowledgments:**

394 This work was supported by the National Natural Science Foundation of China grant  
395 81171880 (SH) and 31371266 (H.Z.) the National Basic Research Program of China  
396 grant 2011CB51001 (S.H.).

397

398 **Author contributions:**

---

399 Y.Z., X.L., and H.C. performed experiments and data analysis. H.Z and S.H.  
400 conceived and supervised the study. YZ and SH and analyzed the data and wrote the  
401 first draft of the manuscript and all authors participated in revising the manuscript.

402

### 403 **Competing Interests**

404 The authors declare that they have no competing interests.

405

### 406 **Materials and Methods:**

407

#### 408 **Ancient DNA sequencing**

409 Archaeological sites and samples were described in details in supplementary  
410 materials. Two teeth from each sample were collected for DNA sequencing analyses  
411 as we did in a previous study<sup>33</sup>. Appropriate precautions were taken to ensure the  
412 authenticity of the ancient DNA results.

413

#### 414 **Sequence download**

415 We downloaded ancient and modern human genome sequences from the relevant  
416 websites using publically available accession numbers.

417

#### 418 **Selection and identification of SNPs**

419 Selecting SNPs: The random selection of autosomal 255K SNPs as fast evolving  
420 SNPs (none from the X chr) and the selection of the slow evolving SNPs were as  
421 described previously<sup>7</sup>.

422 Calling SNPs: We used publically available software SAMTOOLS, GATK, and  
423 VCFTOOLS to call SNPs from either downloaded BAM files or BAM files we  
424 generated based on downloaded fastq data or our own data by using  
425 Burrows-Wheeler Aligner or BWA software<sup>41-43</sup>. For better accuracy of calling SNPs,  
426 the Phred quality score (Q score) was set at 50, DP $\geq$ 10, and alt frequency  $\geq$ 0.8.  
427 For the ancient Y chromosome DNAs, the filters for calling SNPs included DP $>$ 4 and  
428 alt frequency  $\geq$ 0.8.

429

#### 430 **Genetic distance analyses and other population genetics methods**

431 Genetic distance: Pairwise genetic distances of either hom distances (mismatch in  
432 hom sites) or total distances (mismatch in het and hom sites combined) were  
433 calculated using the custom made software “dist” as previously described<sup>7</sup>. This  
434 software is freely available at <https://github.com/health1987/dist> and has been  
435 described in detail in previous publications<sup>44,45</sup>.

436

437 **PC analysis:** We utilized GCTA to analyze data in the PLINK binary PED format to  
438 generate two files (\*.eigenvec and \*.eigenva). We drew PCA plot using \*.eigenvec file  
439 <sup>46,47</sup>.

440

441 **Other methods:** Other common statistical methods used were Student’s t test, chi  
442 square test, and Fisher’s exact test, 2 tailed, and Spearman correlation coefficient R

443 analysis using Prism6 of Graphpad.

444

445 **Accession codes**

446 The raw reads of ancient DNAs reported here have been deposited at NCBI with  
447 accession number xxxx.

448

449

450 **References:**

451

452 1 Chang, K.-C., Xu, P. & Lu, L. *The formation of Chinese Civilization, an archaeological*  
453 *perspective*. (Yale University Press, 2005).

454 2 Guo, D. Why the Hongshan culture is "taproot system" of Chinese ancient culture? *J. Liaoning*  
455 *Normal University (Social Science Edition)* **39**, 121-131 (2016).

456 3 Yan, S. *et al.* Y chromosomes of 40% Chinese descend from three Neolithic  
457 super-grandfathers. *PLoS ONE* **9**, e105691, doi:10.1371/journal.pone.0105691 (2014).

458 4 He, P. *et al.* Neolithic super-grandfather Y haplotypes, their related surnames, and autism  
459 spectrum disorder. *bioRxiv* <https://doi.org/10.1101/077222> (2017).

460 5 Wen, S.-Q., Tong, X.-Z. & Li, H. Y-chromosome-based genetic pattern in East Asia affected by  
461 Neolithic transition. *Quaternary International* (2016).

462 6 Yuan, D. & Huang, S. On the peopling of the Americas: molecular evidence for the  
463 Paleoamerican and the Solutrean models. *bioRxiv* **bioRxiv 130989**; doi:  
464 <https://doi.org/10.1101/130989> (2017).

465 7 Yuan, D. *et al.* Modern human origins: multiregional evolution of autosomes and East Asia  
466 origin of Y and mtDNA. *bioRxiv*, doi: <https://doi.org/10.1101/106864> (2017).

467 8 Huang, S. Primate phylogeny: molecular evidence for a pongid clade excluding humans and a  
468 prosimian clade containing tarsiers. *Sci China Life Sci* **55**, 709-725 (2012).

469 9 Huang, S. New thoughts on an old riddle: What determines genetic diversity within and  
470 between species? *Genomics* **108**, 3-10, doi:10.1016/j.ygeno.2016.01.008 (2016).

471 10 Hu, T. *et al.* The genetic equidistance result, misreading by the molecular clock and neutral  
472 theory and reinterpretation nearly half of a century later. *Sci China Life Sci* **56**, 254-261  
473 (2013).

474 11 Huang, S. Inverse relationship between genetic diversity and epigenetic complexity. *Preprint*  
475 *available at Nature Precedings* doi.org/10.1038/npre.2009.1751.1032 (2009).

476 12 Lei, X., Yuan, J., Zhu, Z. & Huang, S. Collective effects of common SNPs and risk prediction in  
477 lung cancer. *Heredity*, doi:10.1038/s41437-41018-40063-41434 (2018).

478 13 Auton, A. *et al.* A global reference for human genetic variation. *Nature* **526**, 68-74,  
479 doi:10.1038/nature15393 (2015).

480 14 Peng, S., Zhu, Y., Guo, Z. & Wang, L. Excavation in 1998 on the Dashanqian site in Harqin  
481 Banner, Inner Mongolia. *Archaeology* **3**, 31-39 (2004).

482 15 Zhang, Y. Preliminary report on the excavation to the Neolithic cemetery at Hala Haigou  
483 village, Chifeng city, Inner Mongolia. *Archaeology* **2**, 19-35 (2010).

484 16 Tian, J. *et al.* The graves of Shang and Zhou dynasties in Qiaobei, Fushan. *J. Ancient*  
485 *Civilization* **5**, 347-394 (2006).

486 17 Qian, Y. Study on the burial ways of early Yangshao Banpo site. *Archaeology of West China* **8**,

- 
- 487 56-81 (2014).
- 488 18 Wu, Z. Excavation report of 2006 on the Duzhong site, Mianchi, Henan. *Huaxia Archaeology* **3**,  
489 3-18 (2006).
- 490 19 Chen, P. A review of lower Xiajiadian culture. *Beijing Cultural Relics and Archaeology* **3**, 55-64  
491 (2002).
- 492 20 Mongolia, T. The Zhukaigou site in Inner Mongolia. *Acta Archaeologica Sinica* **3**, 301-332  
493 (1988).
- 494 21 Sun, L., Chu, X. & Zhu, H. Study of the human skulls from the early Shang site at Xuecun,  
495 Xingyang, Henan. *Huaxia Archaeology* **1**, 55-64 (2013).
- 496 22 Yang, Z. On the character of the city site of the late Yangshao culture at Xishan, Zhengzhou.  
497 *Huaxia Archaeology* **1**, 55-59 (1997).
- 498 23 Zhu, H. The report on human bones identification of Pingganbao site. *Acta Archaeologica*  
499 *Sinica* **4**, 473-479 (1992).
- 500 24 Guo, D. From the crossroads to Y-type culture zone. *Archaeology of Inner Mongolia* **2**, 96-104  
501 (2006).
- 502 25 Liu, S. *et al.* Genomic Analyses from Non-invasive Prenatal Testing Reveal Genetic  
503 Associations, Patterns of Viral Infections, and Chinese Population History. *Cell* **175**, 347-359  
504 e314, doi:10.1016/j.cell.2018.08.016 (2018).
- 505 26 He, G. *Prehistoric West Hunan and Classical Chinese Historical Legends*. (2013).
- 506 27 Fu, Q. *et al.* The genetic history of Ice Age Europe. *Nature* **534**, 200-205,  
507 doi:10.1038/nature17993 (2016).
- 508 28 Lazaridis, I. *et al.* Ancient human genomes suggest three ancestral populations for  
509 present-day Europeans. *Nature* **513**, 409-413, doi:10.1038/nature13673 (2014).
- 510 29 Mallick, S. *et al.* The Simons Genome Diversity Project: 300 genomes from 142 diverse  
511 populations. *Nature* **538**, 201-206, doi:10.1038/nature18964 (2016).
- 512 30 Mathieson, I. *et al.* Genome-wide patterns of selection in 230 ancient Eurasians. *Nature* **528**,  
513 499-503, doi:10.1038/nature16152 (2015).
- 514 31 Jeong, C. *et al.* Long-term genetic stability and a high-altitude East Asian origin for the  
515 peoples of the high valleys of the Himalayan arc. *Proc Natl Acad Sci U S A* **113**, 7485-7490,  
516 doi:10.1073/pnas.1520844113 (2016).
- 517 32 Poznik, G. D. *et al.* Punctuated bursts in human male demography inferred from 1,244  
518 worldwide Y-chromosome sequences. *Nat Genet* **48**, 593-599, doi:10.1038/ng.3559 (2016).
- 519 33 Li, J. *et al.* Ancient DNA reveals genetic connections between early Di-Qiang and Han Chinese.  
520 *BMC Evol Biol* **17**, 239, doi:10.1186/s12862-017-1082-0 (2017).
- 521 34 Sun, L. & Wu, Z. Study on the human skeletal samples of the late Yangshao culture at  
522 Duzhong Mianchi. *Huaxia Archaeology* **3**, 100-109 (2010).
- 523 35 Han, K. X. Some issues in the study of the characteristics of anthropology materials of the  
524 Neolithic Yangshao culture. *Prehistory Research* **3**, 240-256 (1988).
- 525 36 Han, K. & Q., P. A study of the human skeletal remains unearthed from the tombs of the  
526 Miaodigou II culture at Shanxian, Henan province. *Acta Archaeologica Sinica* **2**, 255-270  
527 (1979).
- 528 37 Wei, D., Zhang, Y. & Zhu, H. Research on the human skeletal remains from Xishan, Zhengzhou.  
529 *Cultural Relics of Central China* **2**, 111-119 (2015).
- 530 38 Xu, S. Z. Restudy of the Huangdi Period--the start of Chinese Civilization. *Archaeology and*

- 531 *Cultural Relics* **4**, 19-26 (1997).
- 532 39 Lei, G. Z. Historical remains, Shanhaijing, and Hongshan Culture: the legend of HuangDi and  
533 ZhuanXu and the Hongshan Culture. *Journal of Liaoning Teacher College (Social Science*  
534 *Edition)* **47**, 115-118 (2006).
- 535 40 Cui, Y. *et al.* Y Chromosome analysis of prehistoric human populations in the West Liao River  
536 Valley, Northeast China. *BMC Evol Biol* **13**, 216, doi:10.1186/1471-2148-13-216 (2013).
- 537 41 Li, H. *et al.* The Sequence Alignment/Map format and SAMtools. *Bioinformatics* **25**,  
538 2078-2079, doi:10.1093/bioinformatics/btp352 (2009).
- 539 42 Danecek, P. *et al.* The variant call format and VCFtools. *Bioinformatics* **27**, 2156-2158,  
540 doi:10.1093/bioinformatics/btr330 (2011).
- 541 43 McKenna, A. *et al.* The Genome Analysis Toolkit: a MapReduce framework for analyzing  
542 next-generation DNA sequencing data. *Genome Res* **20**, 1297-1303,  
543 doi:10.1101/gr.107524.110 (2010).
- 544 44 Zhu, Z., Lu, X., Yuan, D. & Huang, S. Close genetic relationships between a spousal pair with  
545 autism-affected children and high minor allele content in cases in autism-associated SNPs.  
546 *Genomics*, 10.1016/j.ygeno.2016.1012.1001, doi:10.1016/j.ygeno.2016.12.001 (2016).
- 547 45 Zhu, Z. *et al.* Collective effects of SNPs on transgenerational inheritance in *Caenorhabditis*  
548 *elegans* and budding yeast. *Genomics* **106**, 23-29, doi:10.1016/j.ygeno.2015.04.002 (2015).
- 549 46 Yang, J., Lee, S. H., Goddard, M. E. & Visscher, P. M. GCTA: a tool for genome-wide complex  
550 trait analysis. *Am J Hum Genet* **88**, 76-82, doi:10.1016/j.ajhg.2010.11.011 (2011).
- 551 47 Purcell, S. *et al.* PLINK: A tool set for whole-genome association and population-based linkage  
552 analyses. *Am J Hum Genet* **81**, 559-575 (2007).

553

554

555

556 **Tables:**

557 **Table 1. Information on ancient samples for which we report the nuclear**  
558 **sequence data in this study.**

| Sample name | Ages (BP) | # SNPs slow | Coverage | Culture          | Sites                               |
|-------------|-----------|-------------|----------|------------------|-------------------------------------|
| FQ17        | 2500      | 1200        | 0.113    | East Zhou        | Fushan Qiaobei, Shanxi              |
| K2          | 3000      | 8300        | 1.2796   | Xiajiadian Upper | Dashanqian, Chifeng, Inner Mongolia |
| K12         | 3000      | 2000        | 0.2071   | Xiajiadian Upper | Dashanqian, Chifeng, Inner Mongolia |
| S1          | 3920      | 350         | 0.043    | Xiaohayan        | Halahaigou, Chifeng, Inner Mongolia |
| SG2046      | 3500      | 1500        | 0.1668   | Xiajiadian Lower | Sanguan, Hebei                      |
| DZ14        | 5000      | 1980        | 0.0712   | Late Yangshao    | Duzhong, Mianchi Henan              |
| BP38        | 6500      | 966         | 0.0556   | Yangshao         | Banpo, Xian                         |
| ZX167       | 5300      | 3722        | 0.0674   | Miaodigou        | Zhengzhou Xishan, Henan             |
| ZX107       | 5300      | 161         | 0.0179   | Miaodigou        | Zhengzhou Xishan, Henan             |
| PAB3002     | 3000      | 2300        | 0.2361   | Gaotaishan       | Pinganbao, Liaoning                 |
| ZK22        | 4200      | 500         | 0.0485   | Zhukaigou        | Zhukaigou, Ordos, Inner Mongolia    |
| H69         | 3500      | 1692        | 0.0304   | Early Shang      | Xuecun, Zhengzhou, Henan            |

559

560

561



562 **Table 2. Ranks in correlation between each pair of ancient samples among 211**  
 563 **Han Chinese in 1KG and 12 ancient samples.** Rank values means the rank of a  
 564 sample on the column among all 223 samples in values of correlation to a sample  
 565 listed on the row.  
 566

|         | FQ17 | K2  | K12 | S1  | SG2046 | DZ14 | BP38 | ZK22 | H69 | ZX167 | ZX107 | PAB3002 |
|---------|------|-----|-----|-----|--------|------|------|------|-----|-------|-------|---------|
| FQ17    |      | 170 | 173 | 169 | 220    | 126  | 182  | 152  | 78  | 74    | 207   | 221     |
| K2      | 20   |     | 7   | 90  | 217    | 206  | 209  | 61   | 169 | 69    | 167   | 193     |
| K12     | 184  | 103 |     | 5   | 222    | 180  | 198  | 174  | 109 | 190   | 192   | 143     |
| S1      | 218  | 215 | 149 |     | 218    | 188  | 206  | 204  | 106 | 211   | 193   | 196     |
| SG2046  | 221  | 219 | 222 | 151 |        | 41   | 99   | 164  | 166 | 173   | 179   | 213     |
| DZ14    | 210  | 222 | 220 | 221 | 10     |      | 1    | 21   | 5   | 215   | 219   | 215     |
| BP38    | 208  | 221 | 203 | 182 | 171    | 16   |      | 187  | 189 | 158   | 210   | 126     |
| ZK22    | 169  | 187 | 189 | 180 | 199    | 43   | 191  |      | 16  | 221   | 202   | 113     |
| H69     | 102  | 217 | 155 | 7   | 214    | 35   | 205  | 18   |     | 222   | 120   | 191     |
| ZX167   | 23   | 172 | 164 | 89  | 161    | 128  | 72   | 208  | 196 |       | 97    | 190     |
| ZX107   | 220  | 213 | 198 | 135 | 204    | 182  | 204  | 197  | 94  | 160   |       | 205     |
| PAB3002 | 222  | 214 | 151 | 61  | 215    | 136  | 90   | 123  | 133 | 204   | 178   |         |

567

568

569 **Table 3. Correlation of ancient samples from China with Han Chinese (CHS) or**  
 570 **Europeans (CEU) of 1kGP.** Shown are Spearman correlation R values in distance to  
 571 EUR samples in 1kGP. Two samples from Han Chinese of 1kGP were shown as  
 572 positive controls. Comparisons were deemed non-informative when R values were  
 573 0.1 – 0 or -0.1 – 0, which happens to be found for randomly scrambled distance  
 574 values as shown for CHS\_HG00478.  
 575

| Sample names       | R in EUR distance |        |        |
|--------------------|-------------------|--------|--------|
|                    | CHS               | CEU    | T test |
| FQ17               | 0.010             | 0.039  | ni     |
| K2                 | 0.423             | 0.229  | <0.01  |
| K12                | 0.179             | 0.165  |        |
| S1                 | 0.125             | 0.080  | <0.01  |
| SG2046             | 0.165             | 0.152  |        |
| DZ14               | 0.136             | 0.126  |        |
| BP38               | 0.197             | 0.126  | <0.01  |
| ZK22               | 0.182             | 0.073  | <0.01  |
| H69                | 0.158             | 0.138  | <0.05  |
| ZX167              | 0.306             | 0.211  | <0.01  |
| ZX107              | -0.024            | 0.010  | ni     |
| PAB3002            | 0.114             | 0.088  | <0.01  |
| CHS_HG00478        | 0.623             | 0.376  | <0.01  |
| CHB_NA18611        | 0.512             | 0.380  | <0.01  |
| CHS_HG00478 random | -0.008            | -0.020 | ni     |

576

577

578 **Figure Legends:**

579 **Figure 1. Relationship of ancient Chinese genomes with present day**

580 **populations.** A. Pairwise genetic distance between K2 sample and 1kGP samples.

581 Distances were mismatches in homozygous sites. SEMs are shown. B. PCA plots

582 (PC1 and PC2) of K2 merged with 1kGP samples using slow SNPs. Only ASN, EUR,

583 and AFR samples of 1kGP are selectively shown. C. PCA plots (PC1 and PC2) of K2

584 merged with 1kGP samples using fast SNPs.

585

586 **Figure 2. Autosomal relationships of aDNAs with Han Chinese samples of 1kGP**

587 **carrying F5, F11, or F46 haplotypes.** R correlation values with 211 Han Chinese and

588 12 aDNAs were obtained and ranked for each aDNA sample. The average rank to F5,

589 F11, or F46 was calculated for each sample listed here and the ratios in the ranks are

590 shown either for each sample (A) or the average of each group (B).

591

592 **Figure 3. Relative autosomal distance of aDNAs to Han Chinese in 1kGP**

593 **grouped by Y haplotypes.** Ranks in R to aDNA groups were determined and ranks

594 were shown for the subtraction value of 'rank to DSQ subtracting the rank to BP

595 (DSQ-BP)' or 'rank to ZX subtracting the rank to BP (ZX-BP)'. Small subtraction ranks

596 means closer rank to DSQ or ZX, and higher value means closer rank to BP.

597

598 **Figure 4. Relationship of the O2a2b1a1a6 haplotype with aDNA samples.** A.

599 Relationship between ancient Tibetans and the aDNA groups in this study. B.

600 Relationship of Tibetans with CDX samples carrying different Y haplotypes. C.

601 Relationship with aDNA groups of this study for CDX samples carrying different Y

602 haplotypes.

603
